# Supplementary material for: Psychotropic Polypharmacy Among Youths With Serious Emotional and Behavioral Disorders Receiving Coordinated Care Services
Source: Atypon-hosted journal article supplement (doi:10.1176/appi.ps.201700357), 2018-03-15
Supplement: appi.ps.201700357.ds001.pdf [file appi.ps.201700357.ds001.pdf]

**Figure 1. CCS and non-CCS Sample Selection**

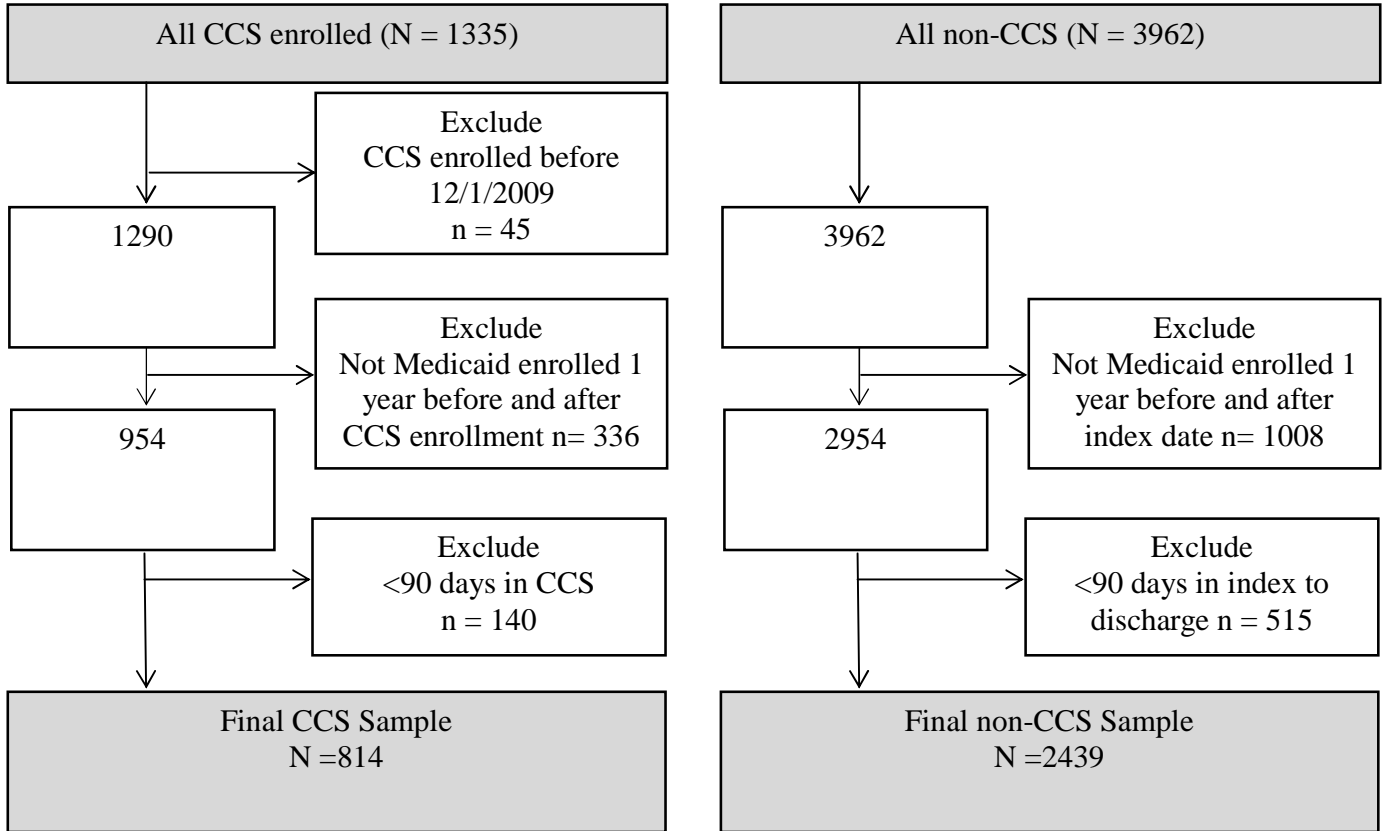

**Appendix Table 1. Demographic Comparison of Matched and Non-Matched Cohorts**

| Sociodemographic Characteristics | CCS     |    |             |    | p     | Non-CCS |    |             |    | p     |
|----------------------------------|---------|----|-------------|----|-------|---------|----|-------------|----|-------|
|                                  | Matched |    | Not Matched |    |       | Matched |    | Not Matched |    |       |
|                                  | N       | %  | N           | %  |       | N       | %  | N           | %  |       |
| <i>Gender</i>                    |         |    |             |    | .060  |         |    |             |    | .839  |
| Male                             | 312     | 63 | 179         | 56 |       | 581     | 59 | 852         | 59 |       |
| Female                           | 184     | 37 | 139         | 44 |       | 412     | 41 | 594         | 41 |       |
| <i>Race</i>                      |         |    |             |    | .141  |         |    |             |    | <.001 |
| White                            | 147     | 30 | 100         | 31 |       | 273     | 27 | 413         | 29 |       |
| Black                            | 316     | 64 | 207         | 65 |       | 661     | 67 | 858         | 59 |       |
| Other                            | 33      | 7  | 11          | 3  |       | 59      | 6  | 175         | 12 |       |
| <i>Age</i>                       |         |    |             |    | .006  |         |    |             |    | <.001 |
| 3-9 years old                    | 58      | 12 | <21         |    |       | 115     | 12 | 351         | 24 |       |
| 10-14 years old                  | 187     | 38 | 132         | 42 |       | 398     | 40 | 474         | 33 |       |
| 15-18 years old                  | 236     | 48 | 164         | 52 |       | 419     | 42 | 457         | 32 |       |
| 19-21 years old                  | 15      | 3  | <21         |    |       | 61      | 6  | 164         | 11 |       |
| <i>Mental Health Services</i>    |         |    |             |    |       |         |    |             |    |       |
| Any Residential Treatment        | 52      | 10 | 126         | 40 | <.001 | 83      | 8  | <11         |    | <.001 |
| Any Psychiatric Hospitalization  | 132     | 27 | 155         | 49 | <.001 | 260     | 26 | 114         | 8  | <.001 |
| Any Psychiatric Emergency Visits | 180     | 36 | 120         | 38 | .677  | 355     | 36 | 371         | 26 | <.001 |
| <i>Psychiatric Diagnoses</i>     |         |    |             |    |       |         |    |             |    |       |
| ADHD                             | 271     | 55 | 209         | 66 | .002  | 535     | 54 | 552         | 38 | <.001 |
| Anxiety                          | 64      | 13 | 43          | 14 | .799  | 123     | 12 | 115         | 8  | .003  |
| Bipolar Disorder                 | 128     | 26 | 134         | 42 | <.001 | 247     | 25 | 113         | 8  | <.001 |
| Conduct Disorder                 | 82      | 17 | 80          | 25 | .003  | 165     | 17 | 125         | 9  | <.001 |
| Depression                       | 132     | 27 | 96          | 30 | .268  | 260     | 26 | 185         | 13 | <.001 |
| Mood Disorder                    | 195     | 39 | 195         | 61 | <.001 | 418     | 42 | 281         | 19 | <.001 |
| Oppositional Disorder            | 83      | 17 | 87          | 27 | .003  | 173     | 17 | 102         | 7  | <.001 |
| Substance Abuse Disorder         | 53      | 11 | 78          | 25 | <.001 | 123     | 12 | 29          | 2  | <.001 |
| Schizophrenia                    | 48      | 10 | 24          | 8  | .296  | 98      | 10 | 81          | 6  | <.001 |
| <i>Psychotropic Medication</i>   |         |    |             |    |       |         |    |             |    |       |
| ADHD Medication                  | 238     | 48 | 186         | 58 | .003  | 484     | 49 | 434         | 30 | <.001 |
| Antidepressant                   | 184     | 37 | 177         | 56 | <.001 | 383     | 39 | 253         | 18 | <.001 |
| Antipsychotic                    | 265     | 53 | 265         | 83 | <.001 | 534     | 54 | 217         | 15 | <.001 |
| Mood Stabilizer                  | 128     | 26 | 177         | 56 | <.001 | 249     | 25 | 101         | 7  | <.001 |
| <i>Child Welfare Services</i>    |         |    |             |    |       |         |    |             |    |       |
| Out-of-home placement            | 229     | 46 | 237         | 75 | <.001 | 473     | 48 | 188         | 13 | <.001 |
| Non-Family OOH placement         | 145     | 29 | 191         | 60 | <.001 | 289     | 29 | 74          | 5  | <.001 |
| <i>Juvenile Justice Services</i> |         |    |             |    |       |         |    |             |    |       |
| Any involvement                  | 216     | 44 | 197         | 62 | <.001 | 400     | 40 | 133         | 9  | <.001 |
| Felony                           | 89      | 18 | 98          | 31 | <.001 | 163     | 16 | 35          | 2  | <.001 |

\*Specified cells are censored to preserve confidentiality and anonymity

**Appendix Table 2. Comparison of Polypharmacy Use Among Matched and Non-Matched Cohorts**

| Observation<br>Period | CCS              |       |                        |       | NONCCS             |       |                         |      |
|-----------------------|------------------|-------|------------------------|-------|--------------------|-------|-------------------------|------|
|                       | Match<br>(N=496) |       | Not matched<br>(N=318) |       | Matched<br>(N=993) |       | Not matched<br>(N=1446) |      |
|                       | N                | %     | N                      | %     | N                  | %     | N                       | %    |
| Pre-period            | 144              | 29.03 | 182                    | 57.23 | 279                | 28.1  | 100                     | 6.92 |
| During Period         | 153              | 30.85 | 165                    | 51.89 | 253                | 25.48 | 120                     | 8.3  |
| Post-period           | 104              | 20.97 | 113                    | 35.53 | 198                | 19.94 | 131                     | 9.06 |
